# Supplementary material for: Graphene crystals grown on a SiO2/Si substrate at low temperatures by controlling the initial nucleation and suppressing subsequent multiple nucleation
Source: Royal Society of Chemistry journal article supplement (doi:10.1039/d3ce00414g), 2023-01-01
Supplement: d3ce00414g1.pdf [file d3ce00414g1.pdf]

## Supporting Information

### Graphene crystals grown on the SiO<sub>2</sub>/Si substrate at low temperature by controlling the initial nucleation and suppressing the subsequent multiple nucleation

Bing Liu,<sup>\*a</sup> Peng Xiao,<sup>a</sup> Chaohui Liu,<sup>a</sup> Jiamin Li,<sup>a</sup> Yingjie Cao<sup>a</sup> and Siguang Ma<sup>\*a</sup>

<sup>a</sup>Ji Hua Laboratory, Foshan 528200, Guangdong Province, China

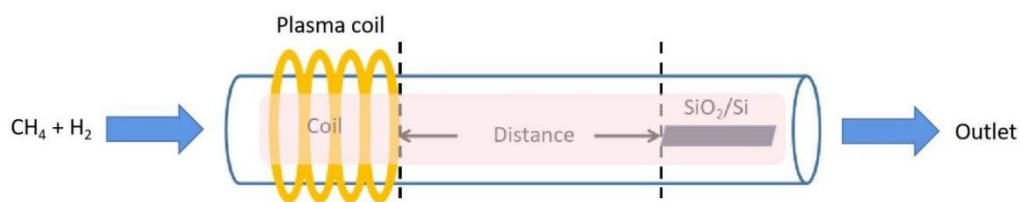

**Fig. S1** Schematic illustration showing the PECVD setup to grow large graphene crystals on the SiO<sub>2</sub> substrate.

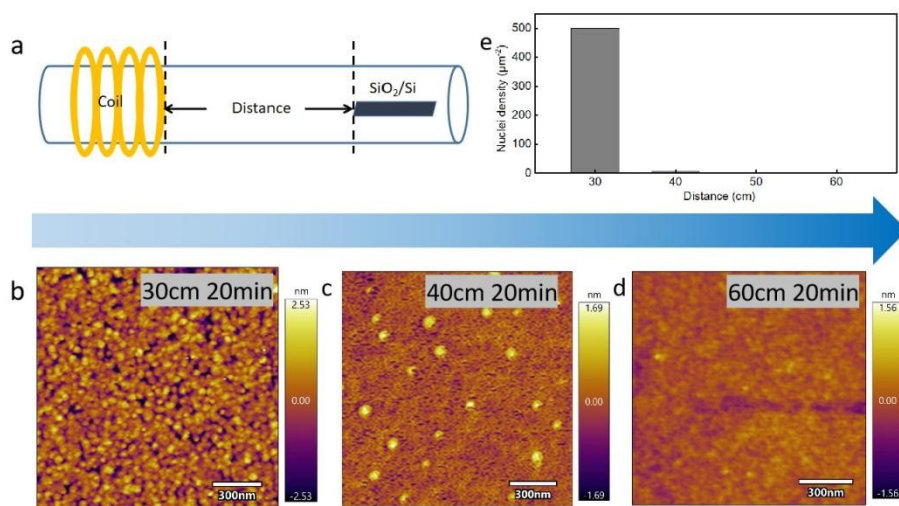

**Fig. S2** (a) Schematic diagram showing the distance between the coil and SiO<sub>2</sub>/Si substrate. (b-d) AFM height images of graphene nucleation at a distance of 30 cm, 40 cm and 60 cm, respectively. (e) Histogram showing the relationship between the distance and the nucleation

density. Other parameters were kept the same: 3.5 sccm CH<sub>4</sub> and 1 sccm H<sub>2</sub>, 20 W, 30 Pa, 20 min. With various distance, the concentrations of active carbon-containing species around the substrate can be very different, which will greatly affect the growth behavior of graphene. At a distance of 30 cm, the shortest distance allowed in our PECVD setup, graphene seeds with a very high density of  $\sim 500 \mu\text{m}^{-2}$  were formed on SiO<sub>2</sub> surface, which almost cover the whole SiO<sub>2</sub> surface (Fig. S2a). This high density shuts down the door of growing large graphene crystals and instead nanographene would be probably achieved. At a longer distance of 40 cm, the density is dramatically decreased to  $\sim 12 \mu\text{m}^{-2}$  (Fig. S2c) due to the decreased concentrations of active carbon-containing species near SiO<sub>2</sub> surface. At a further longer distance of 60 cm, no graphene seeds is even formed after growth (Fig. S2d) because of the insufficient supply of active carbon-containing species for graphene to nucleate. Empirically, 40 cm is adopted as the optimized working distance in this work.

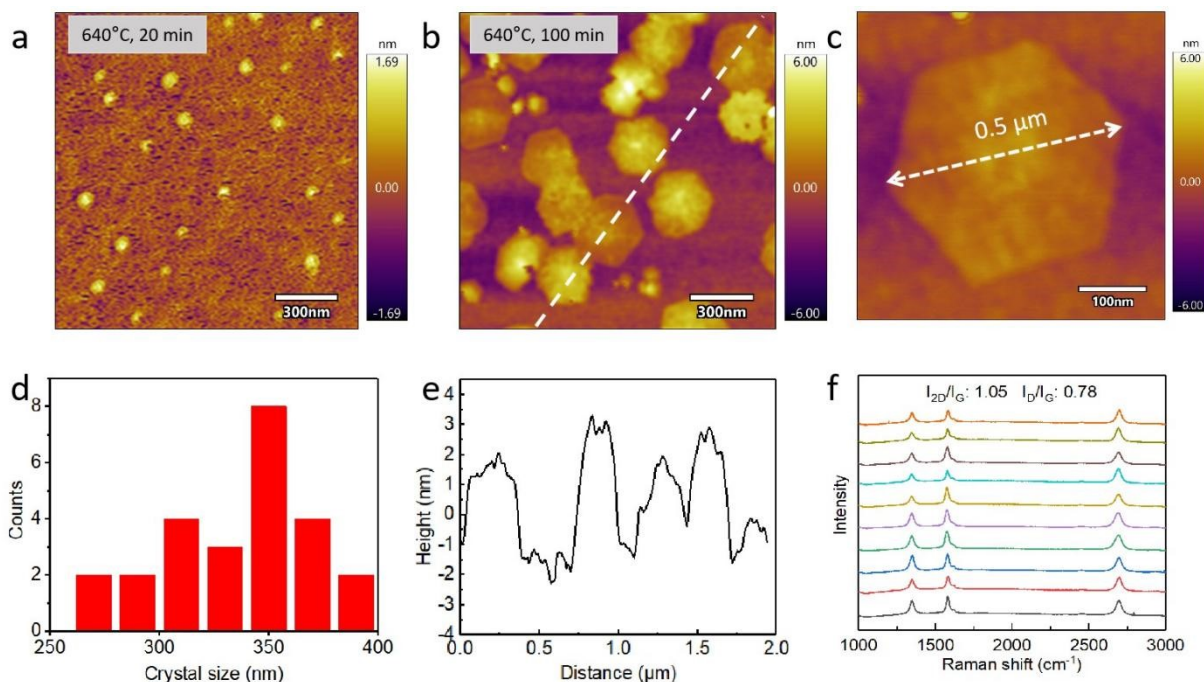

**Fig. S3** AFM height images of SiO<sub>2</sub> surface after growth at 640°C for 20 min (a) and 100 min (b,c). (d) The histogram of statistical distribution of graphene crystal size from sample in (b). (e) The height profile along the white dashed line in (b). (f) Raman spectra of sample from 10 random points in (b). After growth at 640°C for 20 min, small graphene nuclei are formed on the SiO<sub>2</sub> surface with a density of  $\sim 12 \mu\text{m}^{-2}$  and an average size of about 70 nm (Fig. S3a). As the

growth time is further extended to 100 min, these nuclei grow into larger crystals without increasing nucleation density (Fig. S3b). It indicates that the subsequent repeated nucleation during long-time growth is also effectively suppressed under this growth condition. These crystals have an average size of 345 nm (Fig. S3d) and the largest size can reach 0.5  $\mu\text{m}$  (Fig. S3c). However, the nonuniform color contrast in Fig. S3b reflects the giant variations of layer thickness of graphene, as shown by the height profile in Fig. S3e with a large height fluctuation of 3~5 nm, much thicker than the graphene crystals grown at 620°C (Fig. 6). Raman data in Fig. S3f also confirms that thicker graphene is achieved in this case, based on a smaller average  $I_{2D}/I_G$  of  $\sim 1.05$  than that of 1.58 at 620°C.

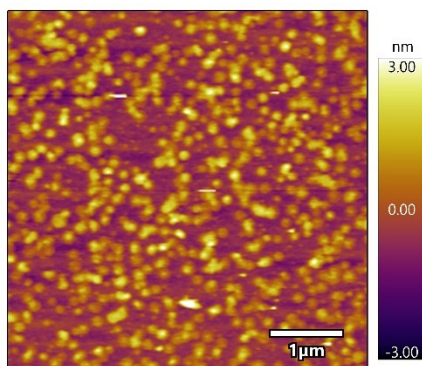

**Fig. S4** AFM height image of  $\text{SiO}_2$  surface after growth at 660°C and under 20 W. At higher temperature above 640°C, even the plasma power is low, the nucleation density increases fast with time, due to the enhanced nucleation rate at higher temperature

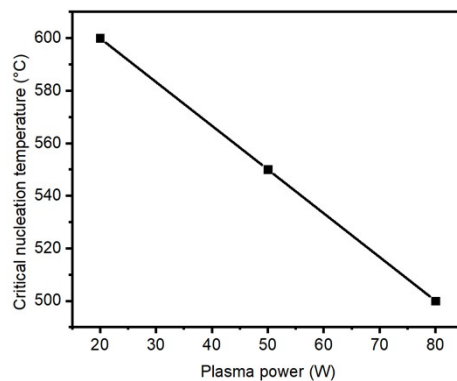

**Fig. S5** The relationship between plasma power and critical nucleation temperature. It seems that the critical nucleation temperature decreases with the increase of plasma power.
